# Supplementary material for: Boosting bifunctional oxygen electrocatalysis by integrating Fe–Nx moieties and FeNi nanoparticles for highly efficient and long-life rechargeable zinc–air batteries
Source: Royal Society of Chemistry journal article supplement (doi:10.1039/d5se00072f), 2025-01-01
Supplement: d5se00072f1.pdf [file d5se00072f1.pdf]

## Electronic supplementary information

### Boosting bifunctional oxygen electrocatalysis by integrating Fe-N<sub>x</sub> moieties and FeNi nanoparticles for highly efficient and long-life rechargeable zinc-air batteries

Zubair Ahmed<sup>a</sup>, Jekaterina Kozlova<sup>b</sup>, Kaupo Kukli<sup>b</sup>, Arvo Kikas<sup>b</sup>, Vambola Kisand<sup>b</sup>, Alexey Treshchalov<sup>b</sup>, Maike Käärrik<sup>a</sup>, Jaan Leis<sup>a</sup>, Jaan Aruväli<sup>c</sup>, and Kaido Tammeveski<sup>a,\*</sup>

<sup>a</sup>*Institute of Chemistry, University of Tartu, Ravila 14a, 50411 Tartu, Estonia*

<sup>b</sup>*Institute of Physics, University of Tartu, W. Ostwald Str. 1, 50411 Tartu, Estonia*

<sup>c</sup>*Institute of Ecology and Earth Sciences, University of Tartu, Vanemuise 46, 51014 Tartu, Estonia*

\*Corresponding author, E-mail address: [kaido.tammeveski@ut.ee](mailto:kaido.tammeveski@ut.ee) (K. Tammeveski)

#### 1. Koutecky-Levich analysis

The ORR polarization curves at different rotation rates were recorded at a scan rate ( $\nu$ ) of 10 mV s<sup>-1</sup> with the electrode rotation rates ( $\omega$ ) from 600 to 3000 rpm. The electron transfer number ( $n$ ) was calculated from the Koutecky-Levich (K-L) equation <sup>1</sup>:

$$j^{-1} = j_k^{-1} + B^{-1} \omega^{-1/2} \quad (\text{S1})$$

$$j_k = nFkC_O \quad (\text{S2})$$

$$B = 0.62nFC_0D_0^{2/3}\nu^{-1/6} \quad (\text{S3})$$

where  $j$  and  $j_k$  represent the experimental and kinetic current densities at a specific potential,  $j_d$  is the diffusion-limited current density,  $n$  is the number of electrons transferred per O<sub>2</sub> molecule,  $k$  is the O<sub>2</sub> reduction rate constant at a specific potential (cm s<sup>-1</sup>),  $F$  is the Faraday constant (96485 C mol<sup>-1</sup>),  $D_0$  is the O<sub>2</sub> diffusion coefficient in 0.1 M KOH (1.9×10<sup>-5</sup> cm<sup>2</sup> s<sup>-1</sup>),  $\nu$  is the kinematic viscosity of the electrolyte solution (0.01 cm<sup>2</sup> s<sup>-1</sup>),  $C_0$  is the concentration of O<sub>2</sub> in the bulk solution (1.2×10<sup>-6</sup> mol cm<sup>-3</sup>), and  $\omega$  is the electrode rotation rate (rad s<sup>-1</sup>)<sup>2</sup>.

#### 2. Zn-air battery tests

Zn-air batteries performance were evaluated at ambient conditions without additional oxygen supply. The polarization curves and galvanostatic discharge–charge cycling curves were recorded by linear sweep voltammetry and CP-Chronopotentiometry, respectively. The specific capacity and round trip efficiency were calculated according to the equation as follows:

$$\text{Specific capacity} = \frac{\text{current} \times \text{service hours}}{\text{weight of consumed zinc}}$$

(S4)

$$\text{Round trip efficiency } (\varepsilon) = \frac{E_{\text{discharge}}}{E_{\text{charge}}} \times 100\%$$

(S5)

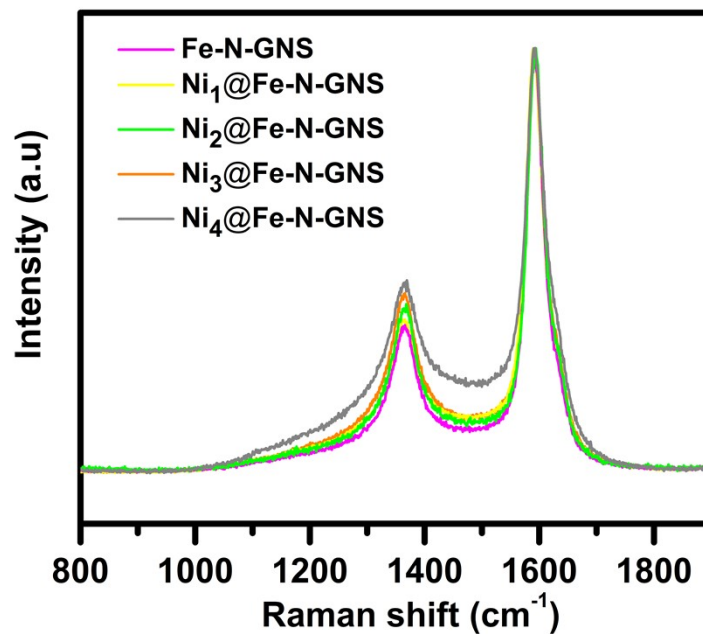

**Fig. S1.** Raman spectra of the prepared Fe-N-GNS, Ni<sub>1</sub>@Fe-N-GNS, Ni<sub>2</sub>@Fe-N-GNS, Ni<sub>3</sub>@Fe-N-GNS, and Ni<sub>4</sub>@Fe-N-GNS catalyst materials.

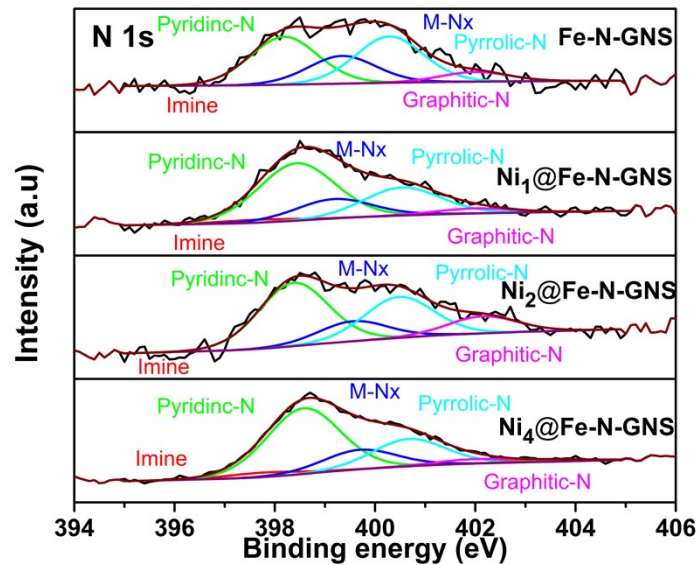

**Fig. S2.** The high-resolution XPS spectra of N 1s for Fe-N-GNS, Ni<sub>1</sub>@Fe-N-GNS, Ni<sub>2</sub>@Fe-N-GNS, and Ni<sub>4</sub>@Fe-N-GNS catalyst materials.

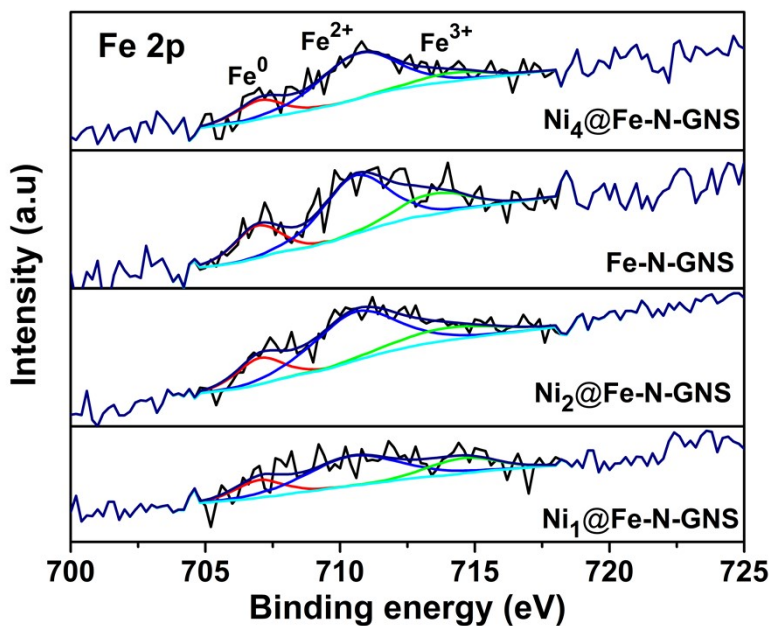

**Fig. S3.** The high-resolution XPS spectra of Fe 2p for Fe-N-GNS, Ni<sub>1</sub>@Fe-N-GNS, Ni<sub>2</sub>@Fe-N-GNS, and Ni<sub>4</sub>@Fe-N-GNS catalyst materials.

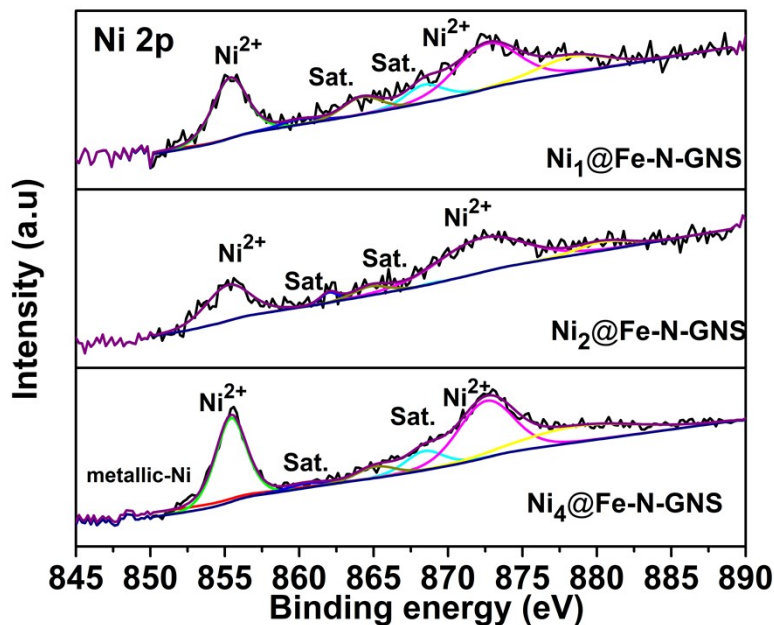

**Fig. S4.** The high-resolution XPS spectra of Ni 2p for Fe-N-GNS, Ni<sub>1</sub>@Fe-N-GNS, Ni<sub>2</sub>@Fe-N-GNS, and Ni<sub>4</sub>@Fe-N-GNS catalyst materials.

**Table S1:** Composition percentage analysis by Rietveld refinement of all the catalysts.

|                                | Fe-N-GNS | Ni <sub>1</sub> @Fe-N-GNS | Ni <sub>2</sub> @Fe-N-GNS | Ni <sub>3</sub> @Fe-N-GNS | Ni <sub>4</sub> @Fe-N-GNS |
|--------------------------------|----------|---------------------------|---------------------------|---------------------------|---------------------------|
| Carbon                         | 96.4     | 96.18                     | 93.8                      | 93.11                     | 93.85                     |
| Fe <sub>3</sub> C              | 1.3      | 0.95                      | 0.93                      | 0                         | 0                         |
| Fe                             | 0.8      | 0.2                       | 0                         | 0                         | 0                         |
| Fe <sub>3</sub> O <sub>4</sub> | 1.5      | 0.63                      | 0.90                      | 0.47                      | 0.27                      |
| FeNi                           | 0        | 2.04                      | 4.43                      | 6.42                      | 5.88                      |

**Table S2.** The surface elemental composition of the prepared catalysts by XPS analysis.

| Element | Functional form | Fe-N-GNS |       | Ni <sub>1</sub> @Fe-N-GNS |       | Ni <sub>2</sub> @Fe-N-GNS |       | Ni <sub>3</sub> @Fe-N-GNS |       | Ni <sub>4</sub> @Fe-N-GNS |       |
|---------|-----------------|----------|-------|---------------------------|-------|---------------------------|-------|---------------------------|-------|---------------------------|-------|
|         |                 | BE (eV)  | at. % | BE (eV)                   | at. % | BE (eV)                   | at. % | BE (eV)                   | at. % | BE (eV)                   | at. % |
| C       | sp <sup>2</sup> | 284.4    | 76.2  | 284.4                     | 77.37 | 284.4                     | 76.66 | 284.4                     | 74.97 | 284.4                     | 70.48 |
|         | sp <sup>3</sup> | 285.1    | 0     | 285                       | 0     | 285.1                     | 0.01  | 285                       | 0     | 285.1                     | 2.73  |
|         | C-O             | 286.3    | 4.05  | 286.3                     | 3.04  | 286.3                     | 3.93  | 286.3                     | 3.2   | 286.3                     | 4.71  |
|         | C=O             | 287.4    | 0.23  | 287.4                     | 1.31  | 287.4                     | 0.56  | 287.4                     | 1.2   | 287.4                     | 0.45  |
|         | O-C=O           | 288.3    | 3.8   | 288.3                     | 1.19  | 288.3                     | 3.39  | 288.3                     | 2.29  | 288.3                     | 3.74  |

|                 |                      |       |      |       |      |       |      |       |      |       |      |
|-----------------|----------------------|-------|------|-------|------|-------|------|-------|------|-------|------|
|                 | $\pi$ - $\pi^*$      | 290.4 | 5.15 | 289.9 | 5.21 | 290.4 | 5.48 | 290.2 | 5.14 | 290.4 | 5.47 |
|                 | Carbide              | 283   | 3.14 | 283   | 2.71 | 282.8 | 2.63 | 283   | 3.74 | 282.7 | 2.09 |
|                 | $\pi$ - $\pi^*$      | 295.5 | 3.43 | 292.5 | 3.52 | 292.1 | 3.52 | 292.3 | 3.94 | 292.7 | 3.28 |
| N               | Imine                | 397.4 | 0    | 397.9 | 0.09 | 397.6 | 0    | 397.8 | 0.08 | 397.6 | 0.03 |
|                 | Pyridinic            | 398.2 | 0.22 | 398.7 | 0.2  | 398.4 | 0.35 | 398.6 | 1.22 | 398.4 | 0.53 |
|                 | M-N <sub>x</sub>     | 399.3 | 0.13 | 399.7 | 0.2  | 399.5 | 0.11 | 399.7 | 0.36 | 399.2 | 0.18 |
|                 | Pyrrolic             | 400.3 | 0.21 | 400.8 | 0.15 | 400.5 | 0.23 | 400.7 | 0.51 | 400.5 | 0.26 |
|                 | Graphitic            | 402   | 0.04 | 402   | 0.01 | 402.1 | 0.09 | 402   | 0.08 | 402.0 | 0.05 |
| O               | Metal oxide          | 530.1 | 0.38 | 530.2 | 0.42 | 530.2 | 0.52 | 530.3 | 0.5  | 530.1 | 0.26 |
|                 | O=C-OH               | 531.2 | 0.54 | 531.2 | 0.7  | 531.2 | 0.4  | 531.2 | 0.84 | 531.2 | 0.8  |
|                 | C=O carbonyl         | 531.7 | 0.57 | 531.7 | 1.26 | 531.6 | 0.5  | 531.9 | 0.78 | 531.3 | 0.33 |
|                 | C-O                  | 532.9 | 1.39 | 532.9 | 2.21 | 532.9 | 0.96 | 532.9 | 1.17 | 532.9 | 1.77 |
|                 | C-OH                 | 533.7 | 0.06 | 533.7 | 0.06 | 533.7 | 0.06 | 533.7 | 0.06 | 533.7 | 0.06 |
|                 | Water, chemisorbed O | 535.4 | 0.34 | 535.4 | 0.37 | 535.8 | 0.15 | 535   | 0.37 | 535   | 0.45 |
| total Fe (at.%) | 0.14                 |       | 0.10 |       | 0.17 |       | 0.14 |       | 0.12 |       |      |
| total Ni (at.%) | 0                    |       | 0.21 |       | 0.27 |       | 0.35 |       | 0.97 |       |      |
| total N (at.%)  | 0.6                  |       | 0.65 |       | 0.78 |       | 2.29 |       | 1.05 |       |      |

**Table S3.** Elemental composition of as-prepared materials by SEM-EDX (wt.%).

| Catalyst                  | C     | N    | O    | Fe   | Ni   |
|---------------------------|-------|------|------|------|------|
| Fe-N-GNS                  | 87.56 | 3.78 | 4.18 | 4.48 | 0    |
| Ni <sub>3</sub> @Fe-N-GNS | 83.82 | 3.8  | 2.84 | 4.68 | 4.86 |
| Ni <sub>4</sub> @Fe-N-GNS | 83.53 | 5.56 | 4.19 | 4.93 | 6.90 |

**Table S4.** BET surface area ( $S_{\text{BET}}$ ), volume of micropores ( $V_{\text{micro}}$ ), total pore volume ( $V_{\text{tot}}$ ), DFT surface area of micropores and mesopores calculated for Fe-N-GNS, Ni<sub>3</sub>@Fe-N-GNS, and Ni<sub>4</sub>@Fe-N-GNS catalysts

| Catalyst                  | $S_{\text{BET}}$<br>(m <sup>2</sup> /g) | $V_{\text{tot}}$<br>(cm <sup>3</sup> /g) | $S_{\text{DFT}}$<br>(m <sup>2</sup> /g) | $S_{\text{DFT micro}}$<br>(m <sup>2</sup> /g) | $S_{\text{DFT meso}}$<br>(m <sup>2</sup> /g) | $V_{\text{micro}}$<br>(cm <sup>3</sup> /g) |
|---------------------------|-----------------------------------------|------------------------------------------|-----------------------------------------|-----------------------------------------------|----------------------------------------------|--------------------------------------------|
| Fe-N-GNS                  | 394                                     | 0.71                                     | 341                                     | 140                                           | 201                                          | 0.08                                       |
| Ni <sub>3</sub> @Fe-N-GNS | 352                                     | 0.56                                     | 328                                     | 180                                           | 148                                          | 0.08                                       |
| Ni <sub>4</sub> @Fe-N-GNS | 300                                     | 0.52                                     | 264                                     | 130                                           | 134                                          | 0.07                                       |

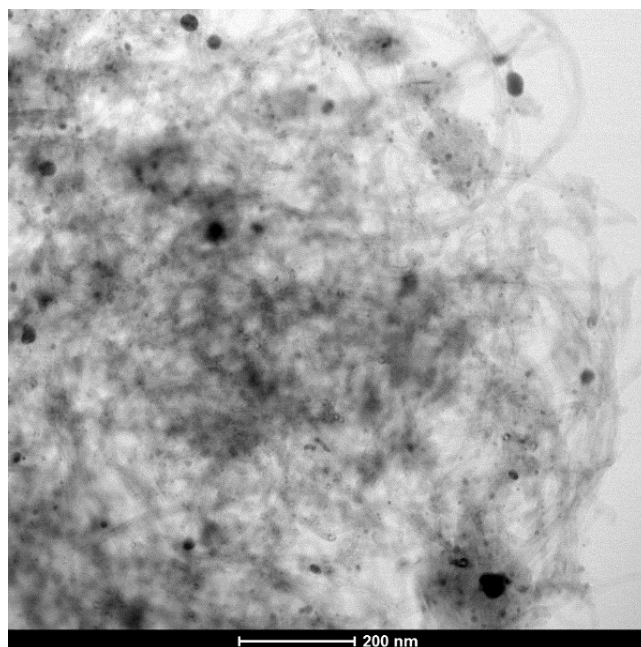

Fig. S5. BF-STEM image of the as-prepared Ni<sub>3</sub>@Fe-N-GNS catalyst.

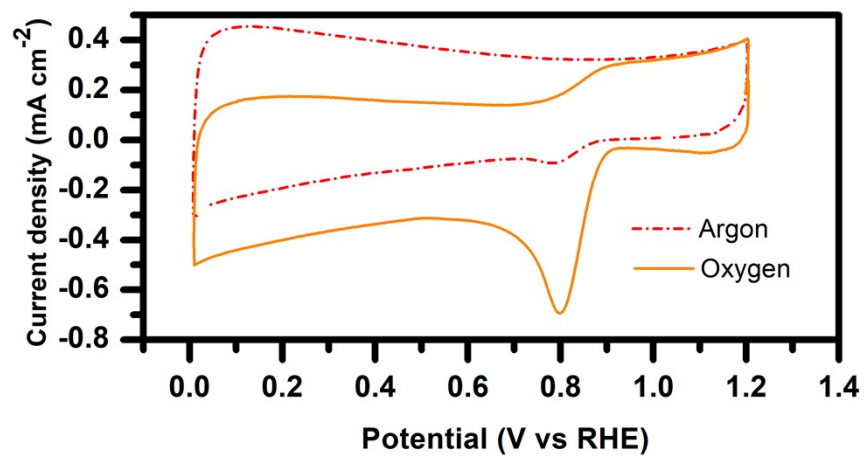

Fig. S6. CV curves of a Ni<sub>3</sub>@Fe-N-GNS catalyst in O<sub>2</sub> and Ar saturated 0.1 M KOH solution (50 mV s<sup>-1</sup>).

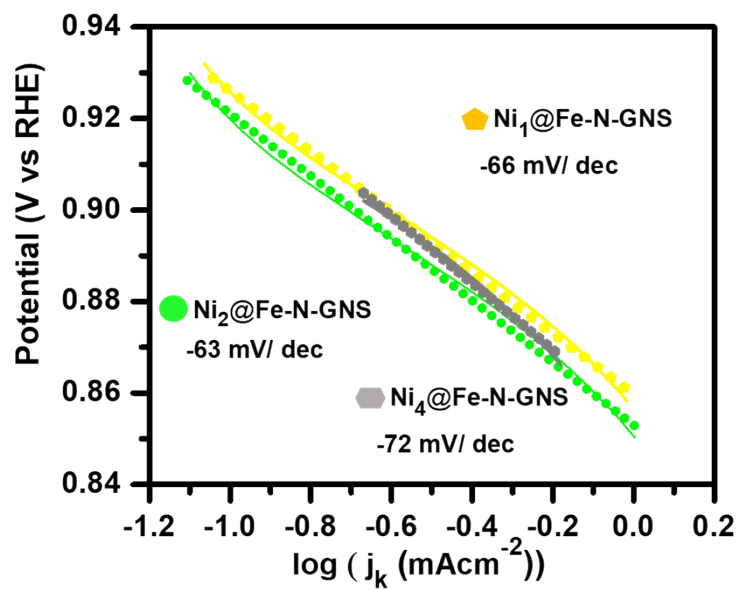

**Fig. S7.** Tafel plots for ORR on the  $\text{Ni}_1@Fe-N-GNS$ ,  $\text{Ni}_2@Fe-N-GNS$ , and  $\text{Ni}_4@Fe-N-GNS$  catalysts.

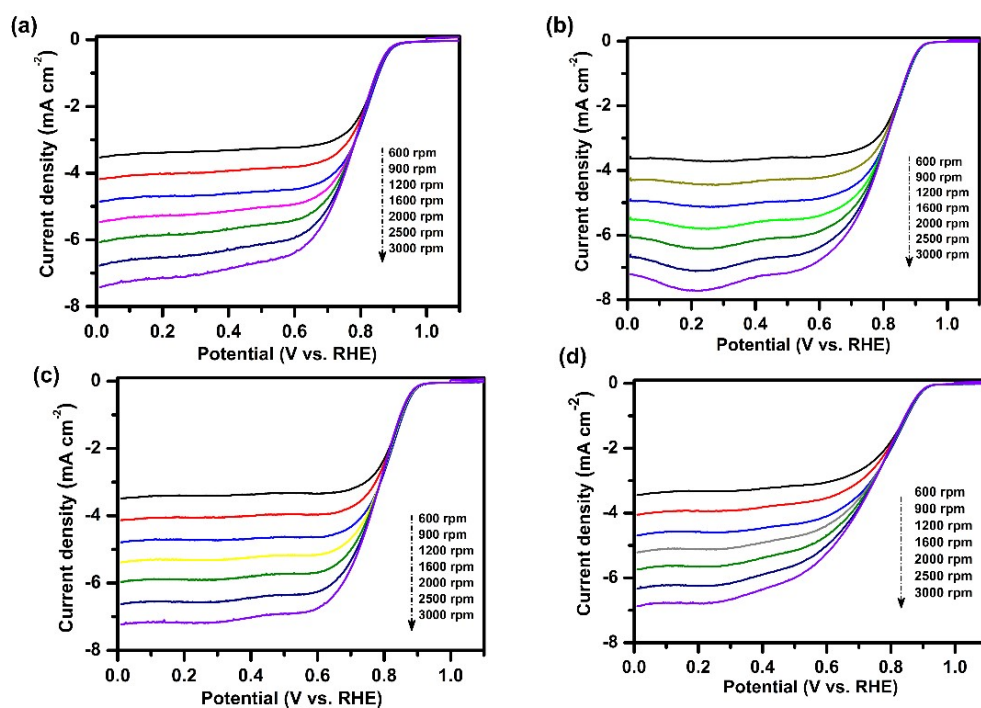

**Fig. S8.** The ORR polarization curves for (a) Fe-N-GNS, (b)  $\text{Ni}_1@Fe-N-GNS$ , (c)  $\text{Ni}_2@Fe-N-GNS$ , and (d)  $\text{Ni}_4@Fe-N-GNS$  catalysts in  $\text{O}_2$ -saturated 0.1 M KOH solution at different rotations rates ( $\nu = 10 \text{ mV s}^{-1}$ ).

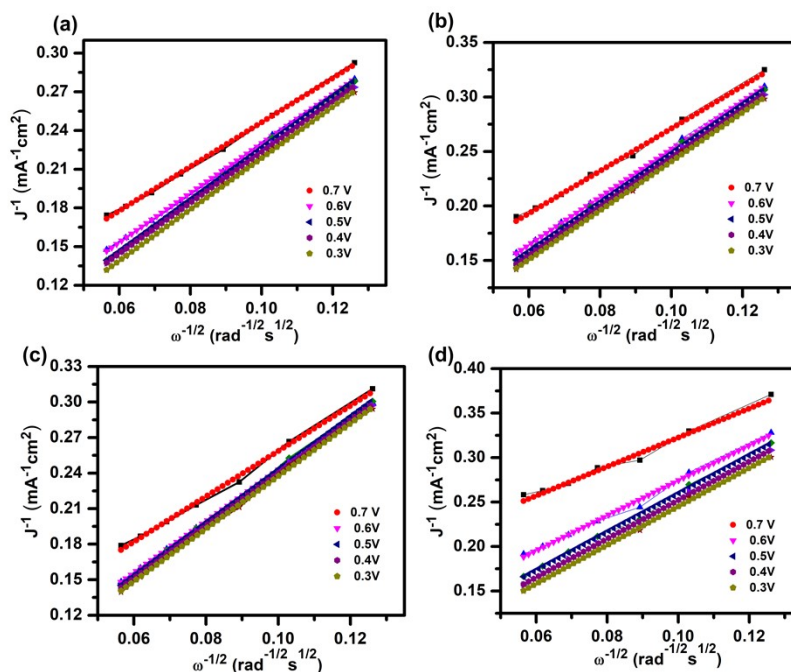

**Fig. S9.** Koutecky-Levich plots for ORR on (a) Fe-N-GNS, (b) Ni<sub>1</sub>@Fe-N-GNS, (c) Ni<sub>2</sub>@Fe-N-GNS, and (d) Ni<sub>4</sub>@Fe-N-GNS catalysts in O<sub>2</sub>-saturated 0.1 M KOH solution at different potentials.

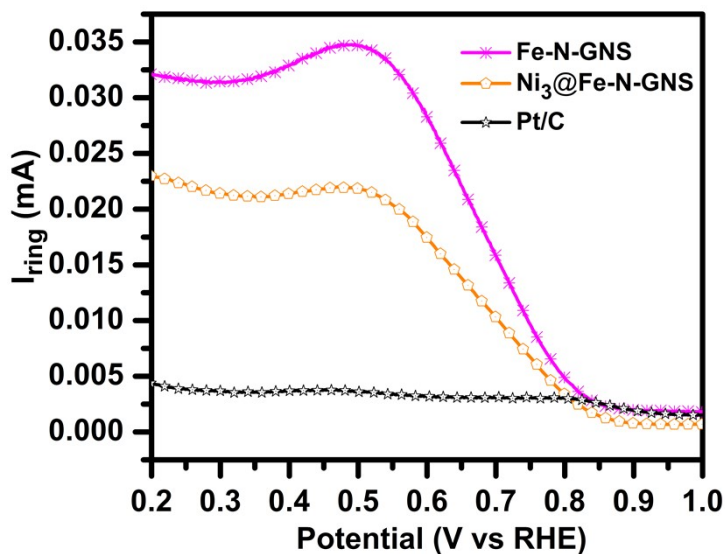

**Fig. S10.** Ring current of Ni<sub>3</sub>@Fe-N-GNS, Fe-N-GNS, and Pt/C catalysts obtained from RRDE test at 1600 rpm.



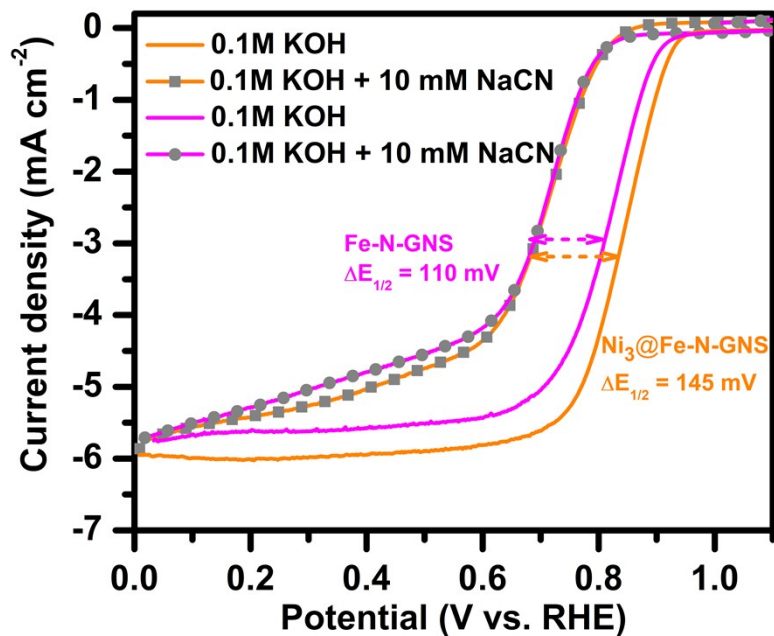

**Fig. S11.** RDE polarisation curve of Ni<sub>3</sub>@Fe-N-GNS and Fe-N-GNS with and without 10mM NaCN in O<sub>2</sub>-saturated 0.1 M KOH at 1600 rpm

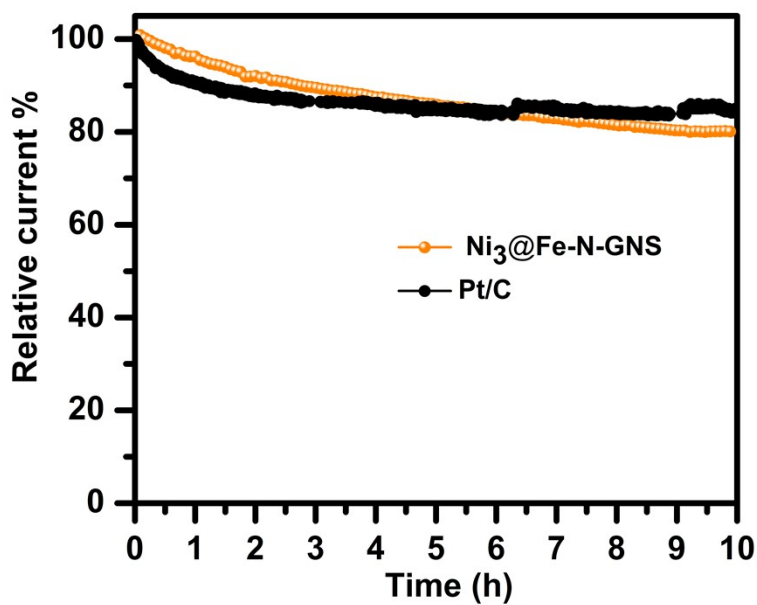

**Fig. S12.** Chronoamperometric reponse of Ni<sub>3</sub>@Fe-N-GNS in O<sub>2</sub>-saturated 0.1 M KOH at 1600 rpm.

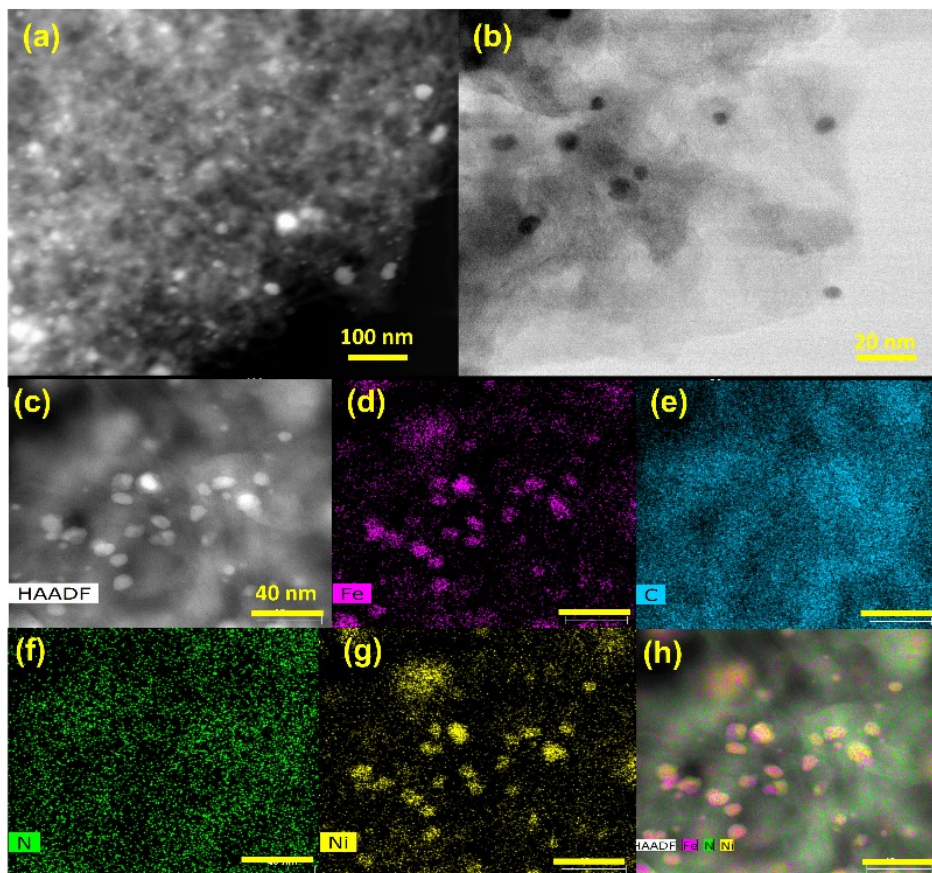

**Fig. S13.** (a-b) STEM images at different magnifications (c-h) HAADF-STEM image and corresponding elemental maps of Fe, C, N, Ni after (i-t) measurement of  $\text{Ni}_3@\text{Fe-N-GNS}$ .

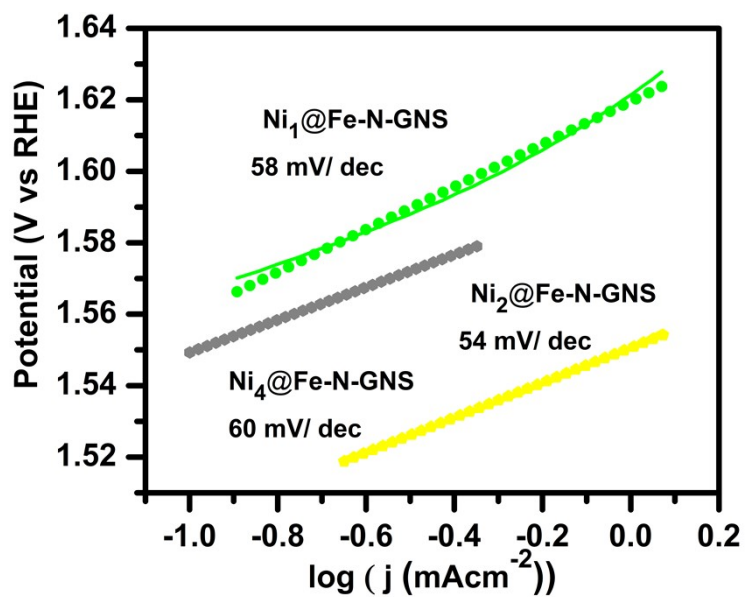

**Fig. S14.** Tafel plots for OER on the  $\text{Ni}_1@\text{Fe-N-GNS}$ ,  $\text{Ni}_2@\text{Fe-N-GNS}$ , and  $\text{Ni}_4@\text{Fe-N-GNS}$  catalysts.

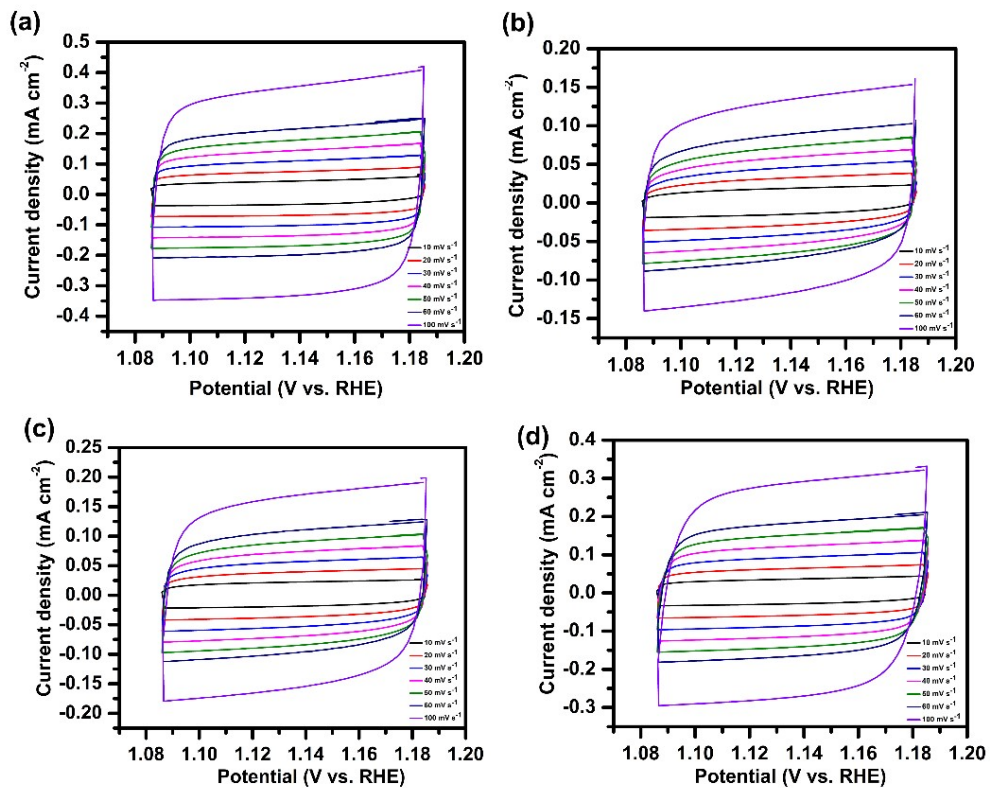

**Fig. S15.** CV's of the (a) Fe-N-GNS, (b) Ni<sub>1</sub>@Fe-N-GNS, (c) Ni<sub>2</sub>@Fe-N-GNS, and (d) Ni<sub>4</sub>@Fe-N-GNS catalyst materials in Ar-saturated 0.1 M KOH solution at scan rates from 10 to 100 mV s<sup>-1</sup>.

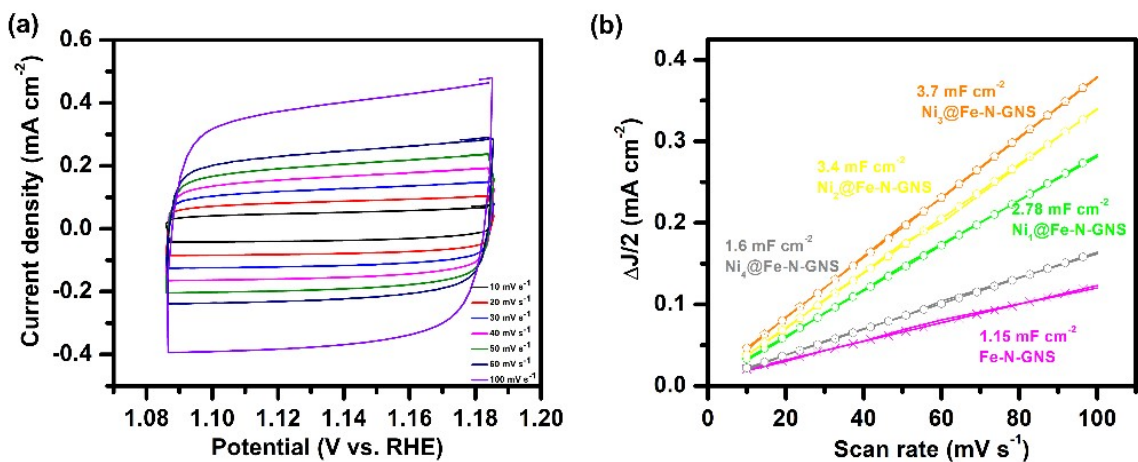

**Fig. S16.** (a) CV's of Ni<sub>3</sub>@Fe-N-GNS catalyst measured in Ar-saturated 0.1 M KOH solution at scan rates from 10 to 100 mV s<sup>-1</sup>. (b)  $C_{dl}$  of all the prepared catalysts.

**Table S5:** Comparison of the ORR and OER parameters of all the prepared catalysts in 0.1 M KOH.

| Catalyst | Loading (mg cm <sup>-2</sup> ) | $E_{onset}$ (V) vs RHE (ORR) | $E_{1/2}$ (V) vs RHE (ORR) | $E_{10}$ (V) vs RHE (OER) |
|----------|--------------------------------|------------------------------|----------------------------|---------------------------|
|----------|--------------------------------|------------------------------|----------------------------|---------------------------|

|                           |     |      |       |      |
|---------------------------|-----|------|-------|------|
| Ni <sub>4</sub> @Fe-N-GNS | 0.2 | 0.91 | 0.771 | *    |
| Ni <sub>3</sub> @Fe-N-GNS | 0.2 | 0.96 | 0.834 | 1.65 |
| Ni <sub>2</sub> @Fe-N-GNS | 0.2 | 0.92 | 0.808 | *    |
| Ni <sub>1</sub> @Fe-N-GNS | 0.2 | 0.92 | 0.808 | 1.68 |
| Fe-N-GNS                  | 0.2 | 0.92 | 0.807 | *    |
| Pt/C                      | 0.1 | -    | 0.838 | -    |
| RuO <sub>2</sub>          | 0.1 | -    | -     | 1.72 |

\*missing values or the catalyst's OER current density does not reach 10 mA cm<sup>-2</sup>.

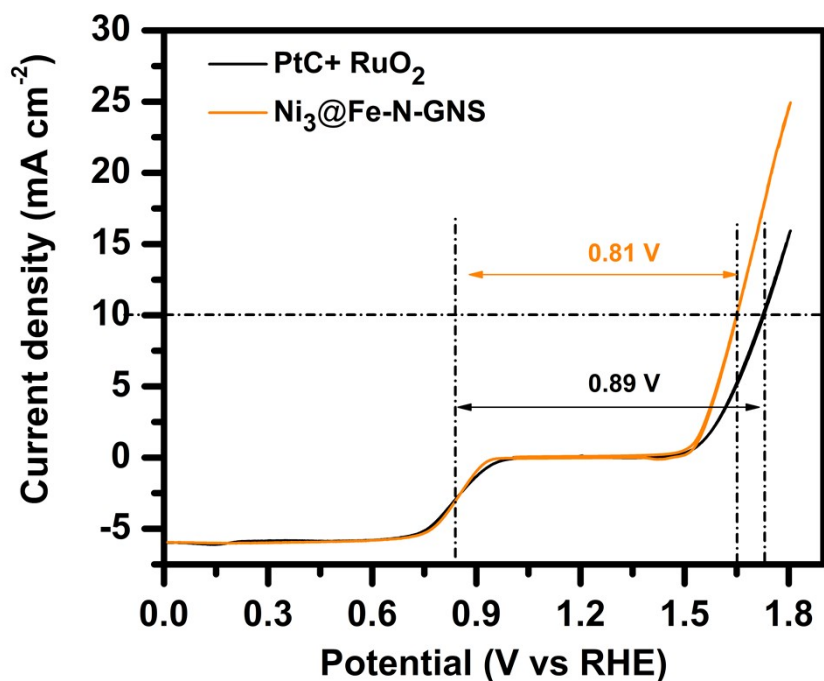

Fig. S17. LSV curves of Ni<sub>3</sub>@Fe-N-GNS and Pt/C + RuO<sub>2</sub> catalysts for ORR and OER in 0.1 M KOH.

Table S6. Bifunctional performance comparison of the Ni<sub>3</sub>@Fe-N-GNS electrocatalyst with other works.

| Catalyst                            | $E_{1/2}$ for ORR (V vs. RHE) | $E_{10}$ for OER (V vs. RHE) or $\eta$ for OER | $\Delta E$ (V) | Voltage gap / V | Stability / h | Ref.      |
|-------------------------------------|-------------------------------|------------------------------------------------|----------------|-----------------|---------------|-----------|
| Ni <sub>3</sub> @Fe-N-GNS           | 0.834                         | 1.65                                           | 0.81           | 0.71            | 180           | This work |
| Ni <sub>0.6</sub> Fe <sub>0.4</sub> | 0.75                          | 1.51                                           | 0.76           | 0.96            | 69            | 3         |
| Ni <sub>3</sub> Fe/N-C              | 0.85                          | 1.56                                           | 0.71           | 0.798           | 300 @ 2 runs  | 4         |
| Ni <sub>3</sub> FeN                 | 0.78                          | 1.588                                          | 0.808          | 0.70            | 100           | 5         |
| CoNi/BCF                            | 0.80                          | 1.60                                           | 0.80           | —               | 60            | 6         |
| Co-NiO NFs                          | 0.79                          | 1.53                                           | 0.74           | 0.72            | 110           | 7         |
| -NiFePS/CNT@NF                      | 0.88                          | $\eta = 232$ mV                                | 0.623          | -               | 132 @ 3 runs  | 8         |
| NiFe/N-CNT                          | 0.75                          | $\eta = 290$ mV                                | 0.77           | 0.61            | 100           | 9         |

|                                                |       |                 |      |       |              |    |
|------------------------------------------------|-------|-----------------|------|-------|--------------|----|
| FeNi <sub>3</sub> @NC                          | 0.86  | $\eta = 277$ mV | 0.65 | 0.75  | 30           | 10 |
| FeCo/Se-CNT                                    | 0.9   | 1.65            | 0.75 | 0.878 | 70           | 11 |
| FeNi@N-CNT/NCSs                                | 0.84  | 1.59            | 0.75 | 0.73  | 40           | 12 |
| CNT@SAC-Co/NCP                                 | 0.87  | 1.61            | 0.74 | 0.51  | 33.6         | 13 |
| NiFe@N-CFs                                     | 0.82  | 1.53            | 0.71 | 0.66  | 150          | 14 |
| Co <sub>0.7</sub> Fe <sub>0.3</sub> @NC2:1-800 | 0.827 | $\eta = 314$ mV | -    | 0.835 | 60           | 15 |
| NiFeP/Pi                                       | 0.82  | 1.44            | 0.62 | 0.70  | 100 @ 3 runs | 16 |
| NiO/NiCo <sub>2</sub> O <sub>4</sub>           | 0.73  | $\eta = 357$ mV | 0.86 | 0.78  | 175          | 17 |

**Table S7.** The comparison of Ni<sub>3</sub>@Fe-N-GNS based Zn-air battery performance with reported works.

| Catalyst                  | Loading (mg cm <sup>-2</sup> ) | OCV (V) | $P_{\max}$ (mW cm <sup>-2</sup> ) | Specific capacity (mAh g <sup>-1</sup> ) | Ref.      |
|---------------------------|--------------------------------|---------|-----------------------------------|------------------------------------------|-----------|
| Ni <sub>3</sub> @Fe-N-GNS | 2                              | 1.47    | 171                               | 894 @20 mA cm <sup>-2</sup>              | This work |
| FePc  CNTs  NiCo/CP       | 0.8                            | 1.44    | 219.5                             | 748.2 @ 10 mA cm <sup>-2</sup>           | 18        |
| Fe/Ni(1:3)-NG             | 1                              | 1.50    | 164.1                             | 824.3                                    | 19        |
| Fe(Zn)-N-C                | 1                              | 1.44    | 193                               | 800@10 mA cm <sup>-2</sup>               | 20        |
| Fe,Mn/N-C                 | 0.5                            | 1.40    | 160.8                             | 902 @ 5 mA cm <sup>-2</sup>              | 21        |
| NiFePS/CNT@NF             | 5                              | 1.41    | 134.5                             | 737.1 @10 mAcm-2                         | 8         |
| NiCoFeP-HN                | 10                             | 1.41    | 109                               | 754 @ 5 mA cm <sup>-2</sup>              | 22        |
| Fe/Co-N-C                 | -                              | 1.52    | 188                               | 808 @ 10 mA cm <sup>-2</sup>             | 23        |
| FeCo-NSC                  | 2                              | 1.51    | 152.8                             | 782.1@20 mA cm <sup>-2</sup>             | 24        |

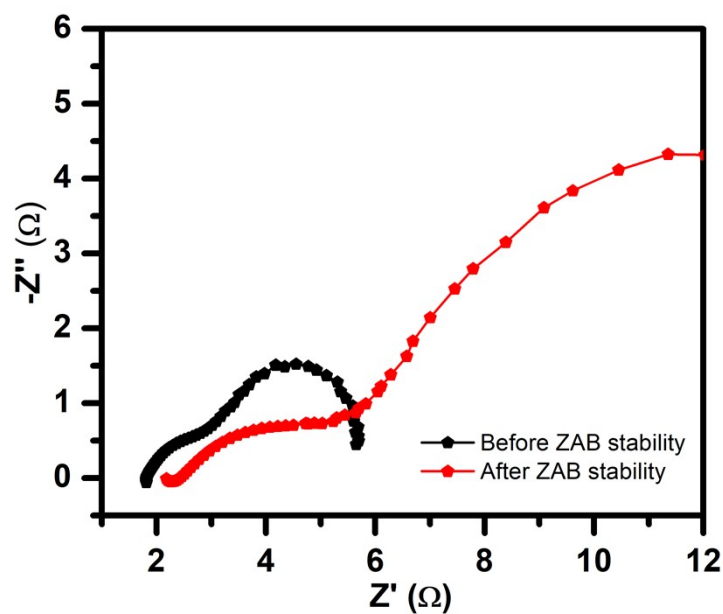

**Fig. S18.** EIS measurement of Ni<sub>3</sub>@Fe-N-GNS catalyst as air cathode in ZAB before and after stability measurement at 1.25 V.



## References:

1. A. J. Bard and L. R. Faulkner, *Electrochemical methods: fundamentals and applications*, John Wiley & Sons, 2nd ed. New York, 2001.
2. X. Ge, A. Sumboja, D. Wu, T. An, B. Li, F. W. T. Goh, T. S. A. Hor, Y. Zong and Z. Liu, *ACS Catalysis*, 2015, **5**, 4643-4667.
3. Y.-y. Li, Q. Zou, Z. Li, D. Xie, Y. Niu, J. Zou, X. Zeng and J. Huang, *Applied Surface Science*, 2022, **572**, 151286.
4. H. Gong, X. Zheng, K. Zeng, B. Yang, X. Liang, L. Li, Y. Tao and R. Yang, *Carbon*, 2021, **174**, 475-483.
5. G. Fu, Z. Cui, Y. Chen, L. Xu, Y. Tang and J. B. Goodenough, *Nano Energy*, 2017, **39**, 77-85.
6. W. Wan, X. Liu, H. Li, X. Peng, D. Xi and J. Luo, *Applied Catalysis B: Environmental*, 2019, **240**, 193-200.
7. G. Fang, J. Gao, J. Lv, H. Jia, H. Li, W. Liu, G. Xie, Z. Chen, Y. Huang, Q. Yuan, X. Liu, X. Lin, S. Sun and H.-J. Qiu, *Applied Catalysis B: Environmental*, 2020, **268**, 118431.
8. B. Liu, S. Wu, G. Chen and Y. Han, *The Journal of Physical Chemistry C*, 2024, **128**, 12346-12354.
9. H. Lei, L. Ma, Q. Wan, Z. Huangfu, S. Tan, Z. Wang and W. Mai, *Nano Energy*, 2022, **104**, 107941.
10. D. Chen, J. Zhu, X. Mu, R. Cheng, W. Li, S. Liu, Z. Pu, C. Lin and S. Mu, *Applied Catalysis B: Environmental*, 2020, **268**, 118729.
11. H. Zhang, M. Zhao, H. Liu, S. Shi, Z. Wang, B. Zhang, L. Song, J. Shang, Y. Yang, C. Ma, L. Zheng, Y. Han and W. Huang, *Nano Letters*, 2021, **21**, 2255-2264.
12. J.-T. Ren, L. Chen, Y.-S. Wang, W.-W. Tian, L.-J. Gao and Z.-Y. Yuan, *ACS Sustainable Chemistry & Engineering*, 2020, **8**, 223-237.
13. J.-C. Li, Y. Meng, L. Zhang, G. Li, Z. Shi, P.-X. Hou, C. Liu, H.-M. Cheng and M. Shao, *Advanced Functional Materials*, 2021, **31**, 2103360.
14. Y. Niu, X. Teng, S. Gong and Z. Chen, *Journal of Materials Chemistry A*, 2020, **8**, 13725-13734.
15. L. Long, H. Liu, J. Jia, Y. Zhang and S. Dong, *Nanoscale*, 2021, **13**, 2609-2617.
16. N. Thakur, M. Kumar, D. Mandal and T. C. Nagaiah, *ACS Applied Materials & Interfaces*, 2021, **13**, 52487-52497.
17. Z. Zhang, X. Liang, J. Li, J. Qian, Y. Liu, S. Yang, Y. Wang, D. Gao and D. Xue, *ACS Applied Materials & Interfaces*, 2020, **12**, 21661-21669.
18. S. Ding, L. He, L. Fang, Y. Zhu, T. Li, Z. Lyu, D. Du, Y. Lin and J.-C. Li, *Advanced Energy Materials*, 2022, **12**, 2202984.
19. Y. Ma, H. Fan, C. Wu, M. Zhang, J. Yu, L. Song, K. Li and J. He, *Carbon*, 2021, **185**, 526-535.
20. Y. Ma, Y. Xiao, Y. Ge, D. Gao, Y. Zhang, Z. Li and Y. Han, *Journal of Materials Chemistry A*, 2024, **12**, 2004-2010.
21. G. Yang, J. Zhu, P. Yuan, Y. Hu, G. Qu, B.-A. Lu, X. Xue, H. Yin, W. Cheng, J. Cheng, W. Xu, J. Li, J. Hu, S. Mu and J.-N. Zhang, *Nature Communications*, 2021, **12**, 1734.
22. B. He, C. Xu, Y. Tang, Y. Qian, H. Liu, Q. Hao and Z. Su, *Journal of Materials Chemistry A*, 2019, **7**, 24964-24972.
23. R. Dun, X. He, J. Huang, W. Wang, I. Yiwei, L. Li, B. Lu, Z. Hua and J. Shi, *Journal of Materials Chemistry A*, 2023, **11**, 5902-5909.
24. Y. Wu, C. Ye, L. Yu, Y. Liu, J. Huang, J. Bi, L. Xue, J. Sun, J. Yang, W. Zhang, X. Wang, P. Xiong and J. Zhu, *Energy Storage Materials*, 2022, **45**, 805-813.
